# Supplementary material for: Charismatic Species as Indicators of Plastic Pollution in the Río de la Plata Estuarine Area, SW Atlantic
Source: Frontiers journal article supplement (doi:10.3389/fmars.2021.699100), 2021-09-16
Supplement: Data_Sheet_1.docx [file Data_Sheet_1.docx]

**Supplementary material of “Charismatic species as indicators of plastic pollution in the Río de la Plata estuarine area, SW Atlantic”, by Victoria González Carman, Pablo Denuncio, Martina Vassallo, María Paula Berón, Karina C. Álvarez, and Sergio Rodriguez-Heredia.**

**Supplementary Table 1.** List of references on focal species in conservation to establish key attributes indicators of plastic pollution.

Aguirre, A.A., and Lutz, P.L. (2004). Marine turtles as sentinels of ecosystem health: is fibropapillomatosis an indicator? *EcoHealth* 1, 275-283.

Becker, P.H., Furness R.W., and Tasker M.L. (2003). “Seabirds as monitors of marine pollution,” in *Seabirds as monitors of the marine environment*, eds. M.L. Tasker and R.W. Furness (Copenhagen, DK: ICES Cooperative Research Report), 3-25.

Bonanno, G., and Orlando-Bonaca, M. (2018). Perspectives on using marine species as bioindicators of plastic pollution. *Mar. Poll. Bull.* 137, 209-221.

Burger, J., and Gochfeld, M. (2004). Marine birds as sentinels of environmental pollution. *EcoHealth* 1, 263-274.

Camedda, A., Marra, S., Matiddi, M., Massaro, G., Coppa, S., Perilli, A., Ruiu, A., Briguglio P., and de Lucia, G.A. (2014). Interaction between loggerhead sea turtles (*Caretta caretta*) and marine litter in Sardinia (Western Mediterranean Sea). *Mar. Environ. Res.* 100, 25-32.

Caro, T.M., and O'Doherty, G. (1999). On the use of surrogate species in conservation biology. *Conserv. Biol*. 13, 805-814.

Caro, T. (2010). *Conservation by Proxy: Indicator, Umbrella, Keystone, Flagship, and Other Surrogate Species.* Washington: Island Press.

Fossi, M.C., Pedà, C., Compa, M., Tsangaris, C., Alomar, C., Claro, F., Ioakeimidis, C., Galgani, F., Hema, T., Deudero, S., Romeo, T., Battaglia, P., Andaloro, F., Caliani, I., Casini, S., Panti, C., and Baini, M. (2018a). Bioindicators for monitoring marine litter ingestion and its impacts on Mediterranean biodiversity. *Environ. Pollut.* 237, 1023-1040.

Furness, R.W., and Camphuysen, K. (1997). Seabirds as monitors of the marine environment. *ICES. J. Mar. Sci.* 54, 726-737.

Hazen, E.L., Abrahms, B., Brodie, S., Carroll, G., Jacox, M.G., Savoca, M.S., Scales K.L., Sydeman W.J., and Bograd, S.J. (2019). Marine top predators as climate and ecosystem sentinels. *Front. Ecol. Environ.* 17, 565-574.

Hilty, J., and Merenlender, A. (2000). Faunal indicator taxa selection for monitoring ecosystem health. *Biol. Conserv.* 92, 185-197.

Miller, A., Nyberg, E., Danielsson, S., Faxneld, S., Haglund, P., and Bignert, A. (2014). Comparing temporal trends of organochlorines in guillemot eggs and Baltic herring: advantages and disadvantage for selecting sentinel species for environmental monitoring. *Mar. Environ. Res*. 100, 38-47.

Roman, L., Schuyler, Q.A., Hardesty, B.D., and Townsend, K.A. (2016). Anthropogenic debris ingestion by avifauna in eastern Australia. *PLoS One* 11:8. doi:10.1371/journal.pone.0158343

Roman, L., Bell, E., Wilcox, C., Hardesty, B.D., and Hindell, M. (2019). Ecological drivers of marine debris ingestion in Procellariiform Seabirds. *Sci. Rep.* 9, 1-8.

Ryan, P.G. (1987). The incidence and characteristics of plastic particles ingested by seabirds. *Mar. Environ. Res.* 23, 175-206.

Schuyler, Q., Hardesty, B.D., Wilcox, C., and Townsend, K. (2014). Global analysis of anthropogenic debris ingestion by sea turtles. *Conserv. Biol.* 28, 129-139.

Tavares, D.C., de Moura, J.F., Merico, A., and Siciliano, S. (2017). Incidence of marine debris in seabirds feeding at different water depths. *Mar. Pollut. Bull.* 119, 68-73.

Van Franeker, J.A., Blaize, C., Danielsen, J., Fairclough, K., Gollan, J., Guse, N., Hansen, P.-L., Heubeck, M., Jensen, J.-K., Le Guillou G., Olsen B., Olsen K.-O., Pedersen, J., Stienen, E.W.M., and Turner, D.M. (2011). Monitoring plastic ingestion by the northern fulmar *Fulmarus glacialis* in the North Sea. *Environ. Pollut.* 159, 2609-2615.

Van Franeker, J.A., and Law, K.L. (2015). Seabirds, gyres and global trends in plastic pollution. *Environ. Pollut.* 203, 89-96.

**Supplementary Table 2.** List of species that interact with plastics in the Warm Temperate Southwest Atlantic. Type of plastic reported are classified as industrial plastic pellets (IND) and user plastics (USE, subcategories: she- sheetlike plastics, thr- threadlike plastics, foa- foamed plastics, fra- fragments and oth- other) according to Provencher et al. (2017) and van Franeker et al. (2011). Origin of plastic reported are classified as urban (URB, plastics from urban centers reaching the marine environment through run-offs, beach tourism or disposed from vessels) and fishing activities (FISH, plastic remains of fishing gears used by artisanal, recreational and industrial fisheries). Abbreviations are: IN. ingestion, EN. entanglement, NC. not calculated, NR. not reported, N. Number of samples (animals/pellets*) evaluated. References are: 1. Rosolem Lima et al., 2018; 2. Awabdi et al., 2013; Di Beneditto and Awabdi, 2014; 3. da Silva Mendes et al., 2015; 4. Guebert-Bartholo et al., 2011; 5. Reis et al., 2010; 6. de Carvalho et al., 2015; 7. Stahelin et al., 2012; 8. Jerdi et al., 2017; 9. Santos et al., 2015; 10. Colferari et al., 2017; 11. Tourinho et al., 2010; 12. Rizzi et al., 2019, 13. Bugoni et al., 2001; 14. González Carman et al., 2014; 15. Vélez-Rubio et al., 2018; 16. Fundación Mundo Marino unpubl.; 17. Gama et al., 2016; 18. Nakashima, 2008; 19. Petry et al., 2021; 20. Di Beneditto et al., 2015a; 21. Di Beneditto and Ramos, 2014; Di Beneditto and Awabdi, 2014; 22. Denuncio et al., 2011; 23. Milmann et al., 2016; 24. Secchi and Zarzur, 1999; 25. Brentano and Petry, 2020; 26. Oliveira et al., 2008; 27. Albernaz, 2013; 28. Denuncio et al., 2017; 29. Franco-Trecu et al., 2017; 30. Brandão et al., 2011; 31. Pinto et al., 2007; Di Beneditto and Siciliano, 2017; 32. Petry and Fonseca, 2002; Petry et al., 2001, 2004, 2009; Petry et al. 2004; 33. Marques et al., 2018; 34. Di Beneditto et al., 2015b; 35. Ewbank et al., 2020; 36. Barbieri, 2009; 37. Petry et al., 2010; 38. Berón and Seco Pon, unpubl.; 39. Leal Valls et al., 2015; 40. Sucunza Perez, 2016; 41. Petry and Benneman, 2017; 42. Colabuono et al., 2009, 2010; Colabuono and Vooren, 2007; 43. Perez et al., 2018; 44. Petry et al., 2008; 45. Petry et al., 2009; 46. Petry et al., 2007; 47. Jiménez et al., 2015; 48. Berón et al., 2016; 49. Lenzi et al., 2016; 50. Burgues et al., 2020; 51. Yorio et al., 2014; 52. Yorio et al., 2020; 53. Silva-Costa and Bugoni, 2013; 54. Berón and Favero, 2009; 55. Berón, 2009; 56. Bugoni and Vooren 2004; 57. Rossi et al., 2019; 58. Vega et al., 2010; 59. Barbieri, 2009; 60. Bugoni, 2006; 61. Carlos et al., 2004; 62. Naves and Vooren, 2006.

| **SPECIES** | **REFERENCE** | **INTERACTION** | **TYPE OF PLASTIC** | **ORIGIN OF PLASTIC** | **RATE OF INCIDENCE** | **N** |
| --- | --- | --- | --- | --- | --- | --- |
| **Order Testudines** |  |  |  |  |  |  |
| **Family Cheloniidae** |  |  |  |  |  |  |
| *Chelonia mydas* | 1 | IN | USE (she, thr, oth) | NR | MEDIUM | 177 |
|  | 2 | IN | USE (she, fra, thr, oth, foa) | URB, FISH | MEDIUM | 49 |
|  | 3 | IN | USE (she, fra, thr, foa, oth) | NR | MEDIUM | 20 |
|  | 4 | IN | USE (she, foa, fra, thr, oth) | URB, FISH | HIGH | 80 |
|  | 5 | IN | USE (she, thr, fra, oth) | NR | MEDIUM | 28 |
|  | 6 | IN | USE (she, foa, fra, thr, oth) | NR | MEDIUM | 15 |
|  | 7 | IN | USE (fra) | URB | NC | 1 |
|  | 8 | IN | NR | NR | LOW | 777 |
|  | 9 | IN | USE (she, thr, fra, oth) | URB, FISH | HIGH | 265 |
|  | 10 | IN | USE (fra, she, thr) | URB, FISH | HIGH | 62 |
|  | 11 | IN | USE (she, thr, foa, fra, oth), IND | URB, FISH | VERY HIGH | 34 |
|  | 12 | IN | USE (she, thr, fra, foa, oth), IND | URB, FISH | VERY HIGH | 48 |
|  | 13 | IN | USE (she, thr, fra, foa) | URB | HIGH | 56 |
|  | 14 | IN | USE (she, thr, fra, foa, oth) | URB | VERY HIGH | 62 |
|  | 15 | IN | USE (fra, she, foa, thr), IND | URB | HIGH | 96 |
|  | 16 | IN | USE (she, foa) | URB | HIGH/VERY HIGH | 184 |
|  | 17 | IN | NR | NR | HIGH | 120 |
|  | 18 | IN | NR | URB, FISH | HIGH | 64 |
|  | 19 | IN | USE (she, thr, fra, oth) | URB, FISH | VERY HIGH | 17 |
| *Caretta caretta* | 6 | IN | USE (she, foa, fra, thr, oth) | NR | NC | 2 |
|  | 20 | IN | USE (fra) | NR | NC | 5 |
|  | 13 | IN | USE (she) | URB | NC | 10 |
|  | 12 | IN | USE (fra, thr, she) | URB, FISH | LOW | 24 |
|  | 16 | IN | USE (she, foa) | URB | VERY LOW/MEDIUM | 57 |
| *Eretmochelys imbricata* | 12 | IN | USE (she) | URB | NC | 2 |
| *Lepidochelys olivacea* | 12 | IN | USE (thr) | FISH | NC | 8 |
|  |  |  |  |  |  |  |
| **Family Dermochelyidae** |  |  |  |  |  |  |
| *Dermochelys coriacea* | 5 | IN | USE (she) | NR | NC | 1 |
|  | 1 | IN | USE (thr, she) | NR | NC | 9 |
|  | 12 | IN | USE (she) | URB | NC | 4 |
|  | 13 | IN | USE (fra) | URB | NC | 2 |
|  | 16 | IN | USE (she, foa) | URB | LOW | 22 |
|  |  |  |  |  |  |  |
| **Infraorder Cetacea, Parvorder Odontoceti** |  |  |  |  |  |  |
| **Family Pontoporiidae** |  |  |  |  |  |  |
| *Pontoporia blainvillei* | 21, 2 | IN | USE (thr, she, fra) | URB, FISH | VERY LOW | 89 |
|  | 22 | IN | USE (she, fra, thr) | URB, FISH, UN | LOW | 49 |
|  | 16 | IN | USE (thr, she) | URB, FISH | VERY LOW | 80 |
|  | 16 | EN | USE (thr) | FISH | VERY LOW | 335 |
| **Family Delphinidae** |  |  |  |  |  |  |
| *Sotalia guianensis* | 21, 2 | IN | USE (thr) | URB, FISH | VERY LOW | 77 |
| *Tursiops truncatus* | 23 | IN | USE (thr) | FISH | VERY LOW | 21 |
| *Globicephala melas* | 16 | IN | USE (she) | URB | NC | 1 |
|  |  |  |  |  |  |  |
| **Family Ziphiidae** |  |  |  |  |  |  |
| *Mesoplodon densirostris* | 24 | IN | USE (thr) | NR | NC | 1 |
|  |  |  |  |  |  |  |
| **Family Kogiidae** |  |  |  |  |  |  |
| *Kogia breviceps* | 25 | IN | USE (she) | URB | NC | 1 |
|  |  |  |  |  |  |  |
| **Infraorder Cetacea, Parvorder Mysticeti** |  |  |  |  |  |  |
| **Family Balaenopteridae** |  |  |  |  |  |  |
| *Balaenoptera physalus* | 16 | EN | USE (thr) | FISH | NC | 1 |
|  |  |  |  |  |  |  |
| **Order Carnivora, Superfamilia Pinnipedia** |  |  |  |  |  |  |
| **Family Otariidae** |  |  |  |  |  |  |
| *Arctocephalus tropicalis* | 26 | IN | USE (thr) | FISH | NC | 14 |
| *Arctocephalus australis* | 27 | IN | NR | NR | NC | 91 |
|  | 28 | IN | USE (she, thr) | URB, FISH | VERY LOW | 133 |
|  | 29 | EN | USE (thr) | FISH | NC | 26 |
|  | 16 | IN | USE (she) | URB | VERY LOW | 1517 |
|  | 16 | EN | USE (thr) | FISH | VERY LOW | 1517 |
| *Otaria flavescens* | 29 | EN | USE (thr) | URB, FISH | NC | 22 |
|  | 29 | IN | USE (thr) | FISH | NC | 1 |
|  | 26 | IN | USE (thr) | FISH | NC | 11 |
|  |  |  |  |  |  |  |
| **Family Phocidae** |  |  |  |  |  |  |
| *Mirounga leonina* | 16 | EN | USE (thr) | FISH | VERY LOW | 65 |
|  |  |  |  |  |  |  |
| **Order Sphenisciformes** |  |  |  |  |  |  |
| **Family Spheniscidae** |  |  |  |  |  |  |
| *Spheniscus magellanicus* | 30 | IN | USE (fra) | URB, FISH | VERY LOW | 175 |
|  | 31 | IN | USE (she, thr) | FISH, UN | LOW | 40 |
|  | 32 | IN | USE (she, foa, fra, thr) | URB, FISH | HIGH | 144 |
|  | 33 | IN | USE (she, thr) | URB, FISH | LOW | 41 |
|  | 16 | IN | USE (fra) | URB | VERY LOW | 2945 |
|  | 16 | EN | USE (thr) | FISH | VERY LOW | 2945 |
|  | 34 | IN | USE (thr, she, foa) | URB, FISH | VERY HIGH | 46 |
|  | 35 | IN | USE (fra, oth), IND | NR | VERY HIGH | 20 |
|  | 58 | IN | NR | NR | VERY LOW | 47 |
| **Order Procellariiformes** |  |  |  |  |  |  |
| **Family Procellariidae** |  |  |  |  |  |  |
| *Macronectes giganteus* | 36 | IN | USE (foa, fra), IND | URB | NC | 14 |
|  | 11 | IN | USE (fra, foa), IND | URB | NC | 2 |
|  | 32, 37 | IN | USE (thr, foa, fra, she) | URB, FISH | NC | 10 |
|  | 38 | EN | USE (thr) | FISH | NC |  |
|  | 16 | EN | USE (thr) | FISH | VERY LOW | 62 |
|  | 59 | IN | USE (thr, oth, fra), IND | NR | NC | 14 |
| *Macronectes halli* | 39 | IN | USE (fra, thr) | URB | NC | 2 |
| *Procellaria aequinoctialis* | 36 | IN | USE (foa, fra), IND | URB | NC | 4 |
|  | 11 | IN | USE (fra, foa), IND | URB | NC | 1 |
|  | 40 | IN | USE (fra, foa, thr) | URB, FISH | HIGH | 32 |
|  | 41 | IN | USE (fra), IND | URB, FISH | MEDIUM | 114 |
|  | 42 | IN | USE (fra, thr), IND | FISH | VERY LOW | 41 |
|  | 32 | IN | USE (thr, foa, fra, she) | URB, FISH | LOW | 36 |
|  | 38 | EN | USE (thr) | FISH | NC |  |
|  | 59 | IN | USE (thr, oth, fra), IND | NR | NC | 4 |
| *Procellaria conspicillata* | 42 | IN | USE (fra, thr), IND | FISH | LOW | 9 |
| *Daption capense* | 36 | IN | USE (foa, fra), IND | URB | NC | 4 |
|  | 32 | IN | USE (thr, foa, fra, she) | URB, FISH | NC | 10 |
|  | 59 | IN | USE (thr, oth, fra), IND | NR | NC | 4 |
| *Fulmarus glacialoides* | 36 | IN | USE (foa, fra), IND | URB | NC | 3 |
|  | 42 | IN | USE (fra, thr), IND | FISH | NC | 9 |
|  | 32 | IN | USE (thr, foa, fra, she) | URB, FISH | MEDIUM | 49 |
|  | 59 | IN | USE (thr, oth, fra), IND | NR | NC | 3 |
| *Pachyptila belcheri* | 36 | IN | USE (foa, fra), IND | URB | NC | 3 |
|  | 59 | IN | USE (thr, oth, fra), IND | NR | NC | 3 |
| *Pterodroma incerta* | 40 | IN | USE (fra, foa, thr), IND | URB, FISH | LOW | 61 |
|  | 43 | IN | NR | NR | LOW | 61 |
| *Pterodroma mollis* | 32 | IN | USE (thr, foa, fra, she) | URB, FISH | NC | 1 |
| *Pterodroma macroptera* | 60 | IN | USE (fra) | NR | NC | 1 |
| *Puffinus puffinus* | 36 | IN | USE (foa, fra), IND | URB | NC | 7 |
|  | 11 | IN | USE (foa, fra), IND | URB | NC | 5 |
|  | 42 | IN | USE (fra, thr), IND | FISH | HIGH | 25 |
|  | 44, 32 | IN | USE (foa, fra, thr, she), IND | URB, FISH | MEDIUM/LOW | 25 |
|  | 59 | IN | USE (thr, oth, fra), IND | NR | NC | 7 |
| *Ardenna gravis* | 36 | IN | USE (foa, fra), IND | URB | HIGH | 29 |
|  | 11 | IN | USE (foa, fra), IND | URB | NC | 4 |
|  | 40 | IN | USE (fra, foa, thr) | URB, FISH | VERY HIGH | 21 |
|  | 42 | IN | USE (fra, thr), IND | FISH | VERY HIGH | 18 |
|  | 44, 32 | IN | USE (she, fra, thr, foa, oth), IND | URB, FISH | VERY HIGH/HIGH | 121 |
|  | 59 | IN | USE (thr, oth, fra), IND | NR | HIGH | 29 |
| *Ardenna grisea* | 36 | IN | USE (foa, fra), IND | URB | NC | 11 |
|  | 11 | IN | USE (foa, fra), IND | URB | NC | 1 |
|  | 44, 32 | IN | USE (she, fra, thr, foa, oth), IND | URB, FISH | MEDIUM/LOW | 17 |
|  | 38 | EN | USE (thr) | FISH | NC |  |
|  | 59 | IN | USE (thr, oth, fra), IND | NR | NC | 11 |
| *Calonectris borealis* | 40 | IN | USE (fra, foa, thr) | URB, FISH | LOW | 34 |
|  | 32 | IN | USE (thr, foa, fra, she) | URB, FISH | VERY HIGH | 112 |
|  | 45 | IN | USE (fra, foa, oth), IND | URB | HIGH | 185 |
|  | 42 | IN | USE (fra, thr), IND | FISH | NC | 5 |
| *Calonectris edwardsii* | 32 | IN | USE (thr, foa, fra, she) | URB, FISH | NC | 3 |
|  |  |  |  |  |  |  |
| **Family Diomedeidae** |  |  |  |  |  |  |
| *Thalassarche melanophris* | 36 | IN | USE (foa, fra), IND | URB | HIGH | 26 |
|  | 46 | IN | USE (fra, thr, oth), IND | NR | LOW | 35 |
|  | 11 | IN | USE (foa, fra), IND | URB | NC | 2 |
|  | 42 | IN | USE (fra) | URB | VERY LOW | 59 |
|  | 32 | IN | USE (thr, foa, fra, she), | URB, FISH | LOW | 35 |
|  | 47 | IN | IND | URB | VERY LOW | 32 |
|  | 48 | EN | USE (thr) | FISH | NC |  |
|  | 38 | EN | USE (thr) | FISH | NC |  |
|  | 16 | IN | USE (foa) | URB | VERY LOW | 39 |
|  | 59 | IN | USE (thr, oth, fra), IND | NR | HIGH | 26 |
| *Thalassarche chlororhynchos* | 36 | IN | USE (foa, fra). IND | URB | NC | 9 |
|  | 42 | IN | USE (fra, thr). IND | FISH | MEDIUM | 27 |
|  | 32 | IN | USE (thr, foa, fra, she) | URB, FISH | NC | 7 |
|  | 38 | EN | USE (thr) | FISH | NC |  |
|  | 59 | IN | USE (thr, oth, fra), IND | NR | NC | 9 |
| *Diomedea dabbenena* | 47 | IN | USE (thr, fra) | FISH | NC | 6 |
| *Diomedea sanfordi* | 47 | IN | USE (fra) | FISH | LOW | 36 |
|  | 61 | IN | USE (fra), IND | NR | NC | 1 |
| *Diomedea epomophora* | 32 | IN | USE (thr, foa, fra, she) | URB | NC | 2 |
|  | 47 | IN | USE (fra) | URB | VERY LOW | 23 |
|  | 16 | IN | USE (fra) | URB | NC | 3 |
|  |  |  |  |  |  |  |
| **Order Charadriiformes** |  |  |  |  |  |  |
| **Family Laridae** |  |  |  |  |  |  |
| *Chroicocephalus maculipennis* | 38 | EN | USE (thr) | FISH | NC |  |
| *Larus dominicanus* | 49 | IN | USE (she) | URB | VERY LOW | 806* |
|  | 50 | IN | USE (thr, she, fra, oth) | URB | LOW | 801* |
|  | 51 | IN | USE (thr) | FISH | NC | 4 |
|  | 51 | EN | USE (thr) | FISH | NC |  |
|  | 48 | EN | USE (thr) | FISH | NC |  |
|  | 52 | IN | USE (thr, she) | FISH | LOW | 1253* |
|  | 38 | EN | USE (thr) | FISH | NC |  |
|  | 16 | EN | USE (thr) | FISH | VERY LOW | 508 |
|  | 53 | IN | NR | NR | VERY LOW | 212* |
| *Larus atlanticus* | 54 | IN | USE (thr) | FISH | VERY LOW | 56 |
|  | 54 | EN | USE (thr) | FISH | VERY LOW |  |
|  | 48 | EN | USE (thr) | FISH | NC |  |
|  | 38 | EN | USE (thr) | FISH | NC |  |
|  | 55 | IN | USE (thr, she) | URB, FISH | VERY LOW | 853* |
| *Sterna hirundinacea* | 48 | EN | USE (thr) | FISH | NC |  |
|  | 38 | EN | USE (thr) | FISH | NC |  |
| *Sterna hirundo* | 56 | IN | USE (fra, thr) | NR | VERY LOW | 714* |
|  |  |  |  |  |  |  |
| **Family Chionididae** |  |  |  |  |  |  |
| *Chionis albus* | 48 | EN | USE (thr) | FISH | NC |  |
|  | 38 | EN | USE (thr) | FISH | NC |  |
|  |  |  |  |  |  |  |
| **Family Haematopodidae** |  |  |  |  |  |  |
| *Haematopus palliatus* | 57 | IN | USE (fra, she), IND | URB, FISH | VERY HIGH | 24 |
|  |  |  |  |  |  |  |
| **Family Rynchopidae** |  |  |  |  |  |  |
| *Rhynchops niger* | 62 | IN | NR | NR | VERY LOW | 451* |
|  |  |  |  |  |  |  |
| **Order Podicipediformes** |  |  |  |  |  |  |
| **Family Podicipedidae** |  |  |  |  |  |  |
| *Podicephorus major* | 48 | EN | USE (thr) | FISH | NC |  |
|  | 16 | IN | USE (she) | URB | VERY LOW | 52 |
|  | 16 | EN | USE (thr) | FISH | VERY LOW | 52 |
| **Order Pelecaniformes** |  |  |  |  |  |  |
| **Family Phalacrocoracidae** |  |  |  |  |  |  |
| *Nannopterum brasilianus* | 16 | EN | USE (thr) | FISH | VERY LOW | 40 |
|  |  |  |  |  |  |  |

List of references on species that interact with plastics in the Warm Temperate Southwest Atlantic.

| **No.** | **Reference** |
| --- | --- |
| 1 | Lima, S.R., Da Silva Barbosa, J.M., Padilha, F.G.F., Saracchini, P.G.V., De Almeida Braga, M., Da Silva Leite, J., and Ferreira, A.M.R. (2018). Physical characteristics of free-living sea turtles that had and had not ingested debris in Microregion of the Lakes, Brazil. *Mar. Pollut. Bull.* 137, 723-727. |
| 2 | Awabdi, D.R., Siciliano, S., and Di Beneditto, A.P.M. (2013). Ingestão de resíduos sólidos por tartarugas-verdes juvenis, *Chelonia mydas* (L. 1758), na costa leste do estado do Rio de Janeiro, Brasil. *Biotemas* 26, 197-200.  Di Beneditto, A.P.M., and Awabdi, D.R. (2014). How marine debris ingestion differs among megafauna species in a tropical coastal area. *Mar. Pollut. Bull.* 88, 86-90. |
| 3 | Da Silva Mendes, S., De Carvalho, R.H., De Faria, A.F., and De Sousa, B.M. (2015). Marine debris ingestion by *Chelonia mydas* (Testudines: Cheloniidae) on the Brazilian coast. *Mar. Pollut. Bull.* 92, 8-10. |
| 4 | Guebert-Bartholo, F.M., Barletta, M., Costa, M.F., and Monteiro-Filho, E.L.A. (2011). Using gut contents to assess foraging patterns of juvenile green turtles *Chelonia mydas* in the Paranaguá Estuary, Brazil. *Endang. Species Res.* 13, 131-143. |
| 5 | Reis, E.C., Pereira, C.S., Rodrigues, D.D.P., Secco, H.K.C., Lima, L.M., Rennó, B., and Siciliano, S. (2010). Condição de saúde das tartarugas marinhas do litoral centro-norte do estado do Rio de Janeiro, Brasil: avaliação sobre a presença de agentes bacterianos, fibropapilomatose e interação com resíduos antropogênicos. *Oecol. Aust.* 14, 756-65. |
| 6 | De Carvalho, R.H., Lacerda, P.D., Da Silva Mendes, S., Barbosa, B.C., Paschoalini, M., Prezoto, F., and De Sousa, B.M. (2015). Marine debris ingestion by sea turtles (Testudines) on the Brazilian coast: an underestimated threat? *Mar. Pollut. Bull.* 101, 746-749. |
| 7 | Stahelin, G.D., Hennemann, M.C., Cegoni, C.T., Wanderlinde, J., E Lima, E.P., and Goldberg, D.W. (2012). Case report: Ingestion of a massive amount of debris by a green turtle (*Chelonia mydas*) in Southern Brazil. *Marine Turtle Newsletter* 117, 3-5. |
| 8 | Jerdy, H., Werneck, M.R., Da Silva, M.A., Ribeiro, R.B., Bianchi, M., Shimoda, E., and De Carvalho, E.C.Q. (2017). Pathologies of the digestive system caused by marine debris in *Chelonia mydas*. *Mar. Pollut. Bull.* 116, 192-195. |
| 9 | Santos, R.G., Andrades, R., Boldrini, M.A., and Martins, A.S. (2015). Debris ingestion by juvenile marine turtles: An underestimated problem. *Mar. Pollut. Bull.* 93, 37-43. |
| 10 | Colferai, A.S., Silva-Filho, R.P., Martins, A.M., and Bugoni, L. (2017). Distribution pattern of anthropogenic marine debris along the gastrointestinal tract of green turtles (*Chelonia mydas*) as implications for rehabilitation. *Mar. Pollut. Bull.* 119, 231-237. |
| 11 | Tourinho, P.S., Ivar Do Sul, J.A., and Fillmann, G. (2010). Is marine debris ingestion still a problem for the coastal marine biota of southern Brazil? *Mar. Pollut. Bull.* 60, 396-401. |
| 12 | Rizzi, M., Rodrigues, F.L., Medeiros, L., Ortega, I., Rodrigues, L., Monteiro, D.S., Kessler, F., and Proietti, M.C. (2019). Ingestion of plastic marine litter by sea turtles in southern Brazil: abundance, characteristics and potential selectivity. *Mar. Pollut. Bull.* 140, 536-548. |
| 13 | Bugoni, L., Krause, L., and Petry, M. (2001). Marine debris and human impacts on sea turtles in southern Brazil. *Mar. Pollut. Bull.* 42, 1330-1334. |
| 14 | González Carman, V., Acha, E.M., Maxwell, S.M., Albareda, D., Campagna, C., and Mianzan, H. (2014). Young green turtles, *Chelonia mydas*, exposed to plastic in a frontal area of the SW Atlantic. *Mar. Pollut. Bull.* 78, 56-65. |
| 15 | Vélez-Rubio, G., Teryda, N., Asaroff, P., Estrades, A., Rodriguez, D., and Tomás, J. (2018). Differential impact of marine debris ingestion during ontogenetic dietary shift of green turtles in Uruguayan waters. *Mar. Pollut. Bull.* 127, 603-611. |
| 16 | Fundación Mundo Marino unpubl. data |
| 17 | Gama, L.R., Domit, C., Broadhurst, M.K., Fuentes, M., and Millar, R.B. (2016). Green turtle *Chelonia mydas* foraging ecology at 25°S in the western Atlantic: evidence to support a feeding model driven by intrinsic and extrinsic variability. *Mar. Ecol. Progr. Ser.* 542, 209-219. |
| 18 | Nakashima, S.B. (2008). *Dieta da tartaruga-verde, Chelonia mydas Linnaeus, 1758 (Testudines, Cheloniidae), no litoral norte do Rio Grande do Sul.* [master’s thesis]. [Rio Grande (RS)]: Pontifícia Universidade Católica do Rio Grande do Sul. <https://repositorio.pucrs.br/dspace/handle/10923/5361>. [Accessed June 25, 2021] |
| 19 | Petry, M.V., Araújo, L.D., Brum, A.C., Benemann, V.R.F., and Finger, J.V.G. (2021). Plastic ingestion by juvenile green turtles (*Chelonia mydas*) off the coast of Southern Brazil. *Marine Pollution Bulletin* 167, 112337. |
| 20 | Di Beneditto, A.P.M., De Moura, J.F., and Siciliano, S. (2015a). Feeding habits of the sea turtles *Caretta caretta* and *Lepidochelys olivacea* in south-eastern Brazil. *Marine Biodiversity Records* 8: e122. <https://doi.org/10.1017/S1755267215001001> |
| 21 | Di Beneditto, A.P.M., and Ramos, R.M.A. (2014). Marine debris ingestion by coastal dolphins: what drives differences between sympatric species? *Mar. Pollut. Bull.* 83, 298-301.  Di Beneditto, A.P.M., and Awabdi, D.R. (2014). How marine debris ingestion differs among megafauna species in a tropical coastal area. *Marine Pollution Bulletin* 88, 86-90. |
| 22 | Denuncio, P., Bastida, R., Dassis, M., Giardino, G., Gerpe, M., and Rodríguez, D. (2011). Plastic ingestion in Franciscana dolphins, *Pontoporia blainvillei* (Gervais and d'Orbigny, 1844), from Argentina. *Mar. Pollut. Bull.* 62, 1836-1841. |
| 23 | Milmann, L., Danilewicz, D., Machado, R., Santos, R.A., and Ott, P.H. (2016). Feeding ecology of the common bottlenose dolphin, *Tursiops truncatus*, in southern Brazil: analyzing its prey and the potential overlap with fisheries. *Braz. J. Oceanogr.* 64, 415-422. |
| 24 | Secchi, E.R. and Zarzur, S. (1999). Plastic debris ingested by a Blainville's beaked whale, *Mesoplodon densirostris*, washed ashore in Brazil. *Aquat. Mamm.* 25, 21-24. |
| 25 | Bertrano, R. and Petry, M.V. (2020). Marine debris ingestion and human impacts on the Pygmy sperm whale (*Kogia breviceps*) in southern Brazil. *Mar. Pollut. Bull.* 150, 110595. https://doi.org/10.1016/j.marpolbul.2019.110595 |
| 26 | Oliveira, L.R., Ott, P.H., and Malbarba, L.R. (2008). “Ecologia alimentar dos pinípedes do sul do Brasil e uma avaliação de suas interações com atividades pesqueiras” in *Ecologia de Mamíferos*, eds. N.R. Reis, A.L. Peracchi, and G.A.S.D. Santos (Londrina: Technical Books Editora), 97-116. |
| 27 | Albernaz, T.L. (2013) Ecologia alimentar do lobo marinho do sul (*Arctocephalus australis*) (Zimmermann, 1783) na costa sul do Rio Grande do Sul. [master’s thesis]. [Rio Grande (RS)]: Universidade Federal do Rio Grande. |
| 28 | Denuncio, P., Mandiola, M.A., Pérez Salles, S., Machado, R., Ott, P.H., Oliveira, L.R., and Rodriguez, D. (2017). Marine debris ingestion by the South American Fur Seal from the Southwest Atlantic Ocean. *Mar. Pollut. Bull.* 122, 420-425. |
| 29 | Franco-Trecu, V., Drago, M., Katz, H., Machín, E., and Marín, Y. (2017). With the noose around the neck: marine debris entangling otariid species. *Environ. Pollut.* 220, 985-989. |
| 30 | Brandão, M.L., Braga, K.M., and Luque, J.L. (2011). Marine debris ingestion by Magellanic penguins, *Spheniscus magellanicus* (Aves: Sphenisciformes), from the Brazilian coastal zone. *Mar. Pollut. Bull.* 62, 2246-2249. |
| 31 | Pinto, M.B.L.C., Siciliano, S., and Di Beneditto, A.P.M. (2007). Stomach contents of the Magellanic penguin *Spheniscus magellanicus* from the northern distribution limit on the Atlantic coast of Brazil. *Mar. Ornithol.* 35, 77-78.  Di Beneditto, A.P.M., and Siciliano, S. (2017). Marine debris boost in juvenile Magellanic penguins stranded in southeastern Brazil in less than a decade: Insights into feeding habits and habitat use. *Mar. Pollut. Bull.* 125, 330-333. |
| 32 | Petry, M.V., and Fonseca, V.D.S. (2002). Effects of human activities in the marine environment on seabirds along the coast of Rio Grande do Sul, Brazil. *Ornitol. Neotrop.* 13, 137-142.  Petry, M.V., Fonseca, V.S.S., and Sander, M. (2001). Food habits of the royal albatross, *Diomedea epomophora* (Lesson, 1825), at the seacoast of Brazil. *Acta Biologica Leopoldensia* 23(2), 207-212.  Petry, M.V., Fonseca, V., and Jost, A.H. (2004). Registro de Pinguins de Magalhães (*Spheniscus magellanicus*) mortos no Rio Grande do Sul. *Acta Biologica Leopoldensia* 26, 139-144.  Petry, M.V., Krüger, L., da Silva Fonseca, V.S., Brummelhaus, J., and da Cruz Piuco, R. (2009). Diet and ingestion of synthetics by Cory’s Shearwater *Calonectris diomedea* off southern Brazil. *Journal of Ornithology* 150(3), 601. |
| 33 | Marques, F.P., Cardoso, L.G., Haimovici, M., and Bugoni, L. (2018). Trophic ecology of Magellanic penguins (*Spheniscus magellanicus*) during the non-breeding period. *Estuar.* *Coast. Shelf S.* 210, 109-122. |
| 34 | Di Beneditto, A.P.M., Santos, R.A., Rosa, K.R., and Siciliano, S. (2015b). Magellanic penguins: stomach contents and isotopic profiles to assess the feeding demands of juveniles in a wintering area off Brazil. *J. Mar. Biol. Assoc. UK* 95, 423-430. |
| 35 | Ewbank, A.C., Sacristán, C., Costa-Silva, S., Antonelli, M., Lorenço, J.R., Nogueira, G.A., Ebert, M.B., Kolesnikovas, C.K., and Catão-Dias, J.L. (2020). Postmortem findings in Magellanic penguins (*Spheniscus magellanicus*) caught in a drift gillnet. *BMC Veterinary Research* 16, 1-10. |
| 36 | Barbieri, E. (2009). Occurrence of Plastic Particles in Procellariiforms, South of São Paulo State (Brazil). *Brazilian Archives of Biology and Technology* 52, 341-348. |
| 37 | Petry, M.V., Petersen, E.S., Scherer, J.F.M., Krüger-Garcia, L., and Scherer, A.L. (2010). Levantamento e dieta de *Macronectes giganteus* ao longo da costa litorânea do Rio Grande do Sul, Brasil. *Rev. Bras. Ornit.* 18, 237-239. |
| 38 | Berón and Seco Pon, unpubl. data |
| 39 | Leal Valls, F.C., Basler A.B., Dos Santos, C.R., and Petry, M.V. (2015). New record on the occurrence of Northern Giant Petrel (*Macronectes halli*) and analysis of stomach contents in Southern Brazil. *Pan-American Journal of Aquatic Sciences* 10, 309-314. |
| 40 | Sucunza Perez, M. (2016) Conteúdo gastrointestinal de petréis (Aves: Procellariiformes) no Litoral do Rio Grande do Sul, Brasil: análise dos itens alimentares e resíduos poliméricos. [master’s thesis]. [Porto Alegre (RS)]: Universidade Católica do Rio Grande do Sul. <http://tede2.pucrs.br/tede2/handle/tede/6772> [Accessed June 25, 2021] |
| 41 | Petry, M.V., and Benemann, V.R.F. (2017). Ingestion of marine debris by the White-chinned Petrel (*Procellaria aequinoctialis*): Is it increasing over time off southern Brazil? *Mar. Pollut. Bull.* 117, 131-135. |
| 42 | Colabuono, F.I., Barquete, V., Domingues, B.S., and Montone, R.C. (2009). Plastic ingestion by Procellariiformes in Southern Brazil. *Mar. Pollut. Bull.* 58, 93-96.  Colabuono, F.I., Taniguchi, S., and Montone, R.C. (2010). Polychlorinated biphenyls and organochlorine pesticides in plastics ingested by seabirds. *Mar. Pollut. Bull.* 60(4), 630-634.  Colabuono, F.I., Vooren, C.M. (2007). Diet of black-browed *Thalassarche melanophrys* and Atlantic yellow-nosed *T. chlororhynchos* albatrosses and white-chinned *Procellaria aequinoctialis* and spectacled *P. conspicillata* petrels off southern Brazil. *Marine Ornithology* 35, 9-20. |
| 43 | Perez, M.S., Daudt, N.W., Tavares, M., Ott, P.H., Santos, R.A., and Fontana, C.S. (2019). Diet of the Atlantic Petrel *Pterodroma incerta* during the non-breeding season. *Marine Ornithology* 47, 43-47. |
| 44 | Petry, M.V., Fonseca, V.S. da S., Garcia, L.K., Piuco, R.C., and Brummelhaus, J. (2008). Shearwater diet during migration along the coast of Rio Grande do Sul, Brazil. *Mar. Biol.* 154, 613-621. |
| 45 | Petry, M.V., Krüger, L., Fonseca, V.S. da S., Brummelhaus, J., and Piuco, R.C. (2009). Diet and ingestion of synthetics by Cory’s Shearwater *Calonectris diomedea* off southern Brazil. *J. für Ornith.* 150, 601-606. |
| 46 | Petry, M.V., Fonseca, V.S. da S., and Scherer, A.L. (2007). Analysis of stomach contents from the black-browed albatross, *Thalassarche melanophris*, on the Coast of Rio Grande do Sul, Southern Brazil. *Polar Biol.* 30, 321-325. |
| 47 | Jiménez, S., Domingo, A., Brazeiro, A., Defeo, O., and Phillips, R.A. (2015). Marine debris ingestion by albatrosses in the southwest Atlantic Ocean. *Mar. Pollut. Bull.* 96, 149-154. |
| 48 | Berón, M.P., Seco Pon, J.P., García, G.O., Copello, S., Zumpano, F., Paz, J., y Ravasi, M.T. (2016). Lo invisible se hace visible: lesiones y mortalidad de aves marinas y costeras asociadas a la pesca recreativa en la costa bonaerense. In: Acta de Resúmenes XI Encuentro Biólogos en Red, Facultad de Ciencias Exactas y Naturales, UNMdP; 2016 Nov 14-15; Mar del Plata. Argentina (2016). p 83. |
| 49 | Lenzi, J., Burgues, M.A., Carrizo, D., Machín, E., and Teixeira-de Mello, F. (2016). Plastic ingestion by a generalist seabird on the coast of Uruguay. *Mar. Pollut. Bull.* 107, 71-76. |
| 50 | Burgues, M.F., Lenzi, J., Machín, E., Genta, L., and Teixeira De Mello, F. (2020). Temporal variation of Kelp Gull’s (*Larus dominicanus*) diet on a coastal island of the Rio de la Plata Estuary, Uruguay: Refuse as an alternative food source. *Waterbirds* 43, 65-74. |
| 51 | Yorio, P., Marinao, C., Suárez, N., 2014. Kelp Gulls (*Larus dominicanus*) killed and injured by discarded monofilament lines at a marine recreational fishery in northern Patagonia. *Mar. Pollut. Bull.* 85,186-189. |
| 52 | Yorio, P., Marinao, C., Kasinsky, T., Ibarra, C., and Suárez, N. (2020). Patterns of plastic ingestion in Kelp Gull (*Larus dominicanus*) populations breeding in northern Patagonia, Argentina. *Mar. Pollut. Bull.* 156, 111240. https://doi.org/10.1016/j.marpolbul.2020.111240 |
| 53 | Silva-Costa, A., and Bugoni, L. (2013). Feeding ecology of Kelp Gulls (*Larus dominicanus*) in marine and limnetic environments. *Aquatic Ecology* 47, 211-224. |
| 54 | Berón, M.P., and Favero, M. (2009). Mortality and injuries of Olrog’s Gull *Larus atlanticus* individuals associated with sport fishing activities in Mar Chiquita coastal lagoon, Buenos Aires Province. *Hornero* 24, 99-102. |
| 55 | Berón, M.P. (2009) Ecología trófica de la Gaviota de Olrog (*Larus atlanticus*) en ambientes naturales y antropizados del Este y Sudeste Bonaerense. [PhD’s thesis]. [Mar del Plata (BA)]: Universidad Nacional de Mar del Plata. |
| 56 | Bugoni, L., and Vooren, C.M. (2004). Feeding ecology of the Common Tern *Sterna hirundo* in a wintering area in southern Brazil. *Ibis* 146, 438-453. |
| 57 | Rossi, L.C., Scherer, A.L., and Petry, M.V. (2019). First record of debris ingestion by the shorebird American Oystercatcher (*Haematopus palliatus*) on the Southern coast of Brazil. *Mar. Pollut. Bull.* 138, 235-240. |
| 58 | Vega, C.M., Siciliano, S., Barrocas, P.R., Hacon, S.S., Campos, R.C., Do Couto Jacob, S., and Ott, P.H. (2010). Levels of cadmium, mercury, and lead in magellanic penguins (*Spheniscus magellanicus*) stranded on the Brazilian Coast. *Archives of environmental contamination and toxicology* 58, 460-468. |
| 59 | Barbieri, E. (2009). Occurrence of plastic particles in procellariiforms, south of Sao Paulo State (Brazil). *Brazilian Archives of Biology and Technology* 52, 341-348. |
| 60 | Bugoni, L. (2006). Great-winged Petrel *Pterodroma macroptera* in Brazil. *Bulletin-British Ornithologists’ Club* 126, 52. |
| 61 | Carlos, C.J., Colabuono, F.I., and Vooren, C.M. (2004). Notes on the Northern Royal Albatross *Diomedea sanfordi* in south Brazil. *Ararajuba* 12, 166-167. |
| 62 | Naves, L.C., and Vooren, C.M. (2006). Diet of black skimmers in southern Brazil. *Waterbirds* 29, 335-344. |

**Supplementary Table 3**. List of references used to assess the occurrence and sampling probability of the charismatic marine species in the Río de la Plata estuarine area**.**

Azpiroz, A.B., Jiménez, S., and Alfaro, M. (2017). Libro Rojo de las Aves del Uruguay. Biología y conservación de las aves en peligro de extinción a nivel nacional. Categorías “Extinto a Nivel Regional”, “En Peligro Crítico” y “En Peligro”. Montevideo: DINAMA and DINARA.

Bastida R, Rodríguez D, Secchi E and da Silva V. (2007). *Mamíferos Marinos Sudamericanos*. Buenos Aires: Vázquez Mazzini Press.

[BirdLife International. (2018). *Calonectris edwardsii*. *The IUCN Red List of Threatened Species* 2018: e.T22729421A132660464. https://dx.doi.org/10.2305/IUCN.UK.2018-2.RLTS.T22729421A132660464.en [Accessed 12 February, 2021](https://dx.doi.org/10.2305/IUCN.UK.2018-2.RLTS.T22729421A132660464.en)].

BirdLife International. (2017). *Chionis albus* (amended version of 2017 assessment). *The IUCN Red List of Threatened Species* 2017: e.T22693556A118854999. <https://dx.doi.org/10.2305/IUCN.UK.2017-3.RLTS.T22693556A118854999.en> [Accessed 12 June, 2021].

Campagna, J., Lewis, M.N., González Carman, V., Campagna, C., Guinet, C., Johnson, M., Davis, R.W., Rodríguez, D.H., and Hindell, M.A. (2020). Ontogenetic niche partitioning in southern elephant seals from Argentine Patagonia. *Mar. Mammal Sci.* doi.org/10.1111/mms.12770

Copello, S., Seco Pon, J.P., and Favero, M. (2013). Use of marine space by Black-browed albatrosses during the non-breeding season in the Southwest Atlantic Ocean. *Estuar. Coast. Shelf* 123, 34-38.

Dellabianca, N.A., and Gribaudo, C.A. (2019). “*Balaenoptera physalus*” in Categorización 2019 de los mamíferos de Argentina según su riesgo de extinción. Lista Roja de los mamíferos de Argentina, eds. SAyDS–SAREM. http://cma.sarem.org.ar [Accessed February 15, 2021].

del Bene, D., Little, V., Rossi, R and Le Bas, A. (2006). “Revisión preliminar de registros de varamientos de cetáceos en la costa uruguaya de 1934 a 2005”, in *Bases para la conservación y el manejo en la costa Uruguaya*, eds. R. Menafra, L. Rodríguez-Gallego, F. Scarabino and D. Conde. (Montevideo, UY: Vida Silvestre Uruguay), 297-303.

Denuncio, P.E., Paso Viola, M.N., Cáceres-Saez, I., Cappozzo, H.L., Rodríguez, D., and Mandiola, A. (2019). “*Pontoporia blainvillei*,” in Categorización 2019 de los mamíferos de Argentina según su riesgo de extinción. Lista Roja de los mamíferos de Argentina, eds. SAyDS–SAREM. http://cma.sarem.org.ar [Accessed February 15, 2021].

Eder, E.B., Negrete, J., Gribaudo, C.A., Daneri, G.A., Marín, M.R., and Grandi, M. F. (2019). “*Mirounga leonina*” in Categorización 2019 de los mamíferos de Argentina según su riesgo de extinción. Lista Roja de los mamíferos de Argentina, eds. SAyDS–SAREM. http://cma.sarem.org.ar [Accessed February 15, 2021].

Falabella, V., Campagna, C., and Croxall, J.P. (2009). *Atlas del Mar Patagónico. Especies y espacios.* Buenos Aires: Wildlife Conservation Society and BirdLife International.

Favero, M., and Silva Rodríguez, M.P. (2005). Estado actual y conservación de aves pelágicas que utilizan la plataforma continental argentina como área de alimentación. *Hornero* 20, 95-110.

Favero, M., Copello, S., García, G., Mariano-Jelicich, R., Ravasi, T., and Seco Pon, J.P. (2016). “Aves marinas de las costas bonaerenses” in *La Costa Atlántica de Buenos Aires: Naturaleza y Patrimonio Cultural,* eds. C. Celsi and J. Athor. (Buenos Aires: Fundación de Historia Natural Félix de Azara), 368-384.

Ferreira, J.M., Oliveira, L.R., Wynen, L., Bester, M.N., Guinet, C., Moraes-Barros, N., Martins, F.M., Muelbert, M.M.C., Moreno, I.B., Siciliano, Salvatore., Ott, P.H., and Morgante, J.S. (2008). Multiple origins of vagrant Subantarctic fur seals: a long journey to the Brazilian coast detected by molecular markers. *Polar Biol.* 31, 303–308.

Gariboldi, M.C., Túnez, J.I., Dejean, C.B., Failla, M., Vitullo, A.D., Negri, M.F., and Cappozzo, H.L (2015). Population Genetics of Franciscana Dolphins (*Pontoporia* *blainvillei*): Introducing a New Population from the Southern Edge of Their Distribution. *PLoS One* 10:7. doi: 10.1371/journal.pone.0132854

Giardino, G, and García, N.A. (2019). “Kogia breviceps” in Categorización 2019 de los mamíferos de Argentina según su riesgo de extinción. Lista Roja de los mamíferos de Argentina, eds. SAyDS–SAREM. http://cma.sarem.org.ar [Accessed February 15, 2021].

Giardino, G., Dellabianca, N.A., and García, N.A. (2019). “*Globicephala melas*” in Categorización 2019 de los mamíferos de Argentina según su riesgo de extinción. Lista Roja de los mamíferos de Argentina, eds. SAyDS–SAREM. http://cma.sarem.org.ar [Accessed February 15, 2021].

González Carman, V., Álvarez, K., Prosdocimi, L., Inchaurraga, M.C., Dellacasa, R.F., Faiella, A., Echenique, C., González, R., Andrejuk, J., Mianzan, H., Campagna, C., and Albareda, D.A. (2011). Argentinian coastal waters: A temperate habitat for three species of threatened sea turtles. *Mar. Biol. Res.* 7, 500-508.

González Carman, V., Falabella, V., Maxwell, S., Albareda, D., Campagna, C., and Mianzan, H. (2012). Revisiting the ontogenetic shift paradigm: The case of juvenile green turtles in the SW Atlantic. *J. Exp. Mar. Biol. Ecol.* 429, 64-72.

González Carman, V., Bruno, I., Maxwell, S., Álvarez, K., Albareda, D., Acha, E.M., and Campagna, C. (2016). Habitat use, site fidelity and conservation opportunities for juvenile loggerhead sea turtles in the Río de la Plata, Argentina. *Mar. Biol.* 163, 20.

González-Solís, J., Felicísimo, A., Fox, J. W., Afanasyev, V., Kolbeinsson, Y., & Muñoz, J. (2009). Influence of sea surface winds on shearwater migration detours. *Mar. Ecol. Progr. Ser.* *391*, 221-230.

Isacch, J.P., and Chiurla, E.H. (1997). Observaciones sobre aves pelágicas en el sudeste bonaerense, Argentina. *Hornero* 14, 253-254.

Jiménez, S., Abente, J.S., Azpiroz, A.B., Savigny, C. and Abreu, M. (2012). First Uruguayan records of Great-winged Petrel *Pterodroma macroptera*. *Bulletin-British Ornithologists’ Club* 132, 209-212.

López-Mendilaharsu, M., Estrades, A., Caraccio, M.N., Calvo, V., Hernández, M., and Quirici, V. (2006). "Biología, ecología y etología de las tortugas marinas en la zona costera uruguaya," in *Bases para la conservación y el manejo de la costa uruguaya*, eds. R. Menafra, L. Rodríguez-Gallego, F. Scarabino and D. Conde. (Montevideo, UY: Vida Silvestre Uruguay), 247-257.

López-Mendilaharsu, M., Rocha, C.F.D., Miller, P., Domingo, A., and Prosdocimi, L. (2009). Insights on leatherback turtle movements and high use areas in the Southwest Atlantic Ocean. *J. Exp. Mar. Biol. Ecol.* 378, 31-39.

Pitman, R.L. and Brownell Jr., R.L. (2020). *Mesoplodon densirostris*. *The IUCN Red List of Threatened Species* 2020: e.T13244A50364253. https://dx.doi.org/10.2305/IUCN.UK.2020-3.RLTS.T13244A50364253.en [Accessed February 15, 2021].

Prosdocimi, L., Bruno, I., Diaz, L., González Carman, V., Albareda, D., and Remis, M. (2014). Southernmost reports of the hawksbill sea turtle, *Eretmochelys imbricata* (Linnaeus, 1766), in Argentina and evidence of a hybrid origin supported by mitochondrial DNA analysis. *Herpetol. Rev.* 45, 1-5.

Rodríguez, D. and Bastida, R. (1998). Four hundred years in the history of pinniped colonies around Mar del Plata, argentina. *Aquatic Conserv.: Mar. Freshw. Ecosyst.* 8, 721-735.

Romero, M.A., Grandi, M.F., Túnez, J.I., Gribaudo, C.A., Reyes, L-M., Dassis, M., Paso Viola, N., and Negrete, J. (2019). “*Otaria flavescens*” in Categorización 2019 de los mamíferos de Argentina según su riesgo de extinción. Lista Roja de los mamíferos de Argentina, eds. SAyDS–SAREM. http://cma.sarem.org.ar [Accessed February 15, 2021].

Secchi, E., Santos, M.C. de O., and Reeves, R. (2018). *Sotalia guianensis* (errata version published in 2019). *The IUCN Red List of Threatened Species* 2018: e.T181359A144232542. https://dx.doi.org/10.2305/IUCN.UK.2018-2.RLTS.T181359A144232542.en [Accessed February 15, 2021].

Silva Rodríguez, M.P., Favero, M., Berón, M.P., Mariano-Jelicich, R., and Mauco, L. (2005). Ecología y conservación de aves marinas que utilizan el litoral bonaerense como área de invernada. *Hornero* 20, 111-130.

Vales, D.G., Mandiola, A, Romero, M.A., Svendsen, G., Túnez, J.I., Negrete, J., and Grandi, M.F. (2019). “*Arctocephalus australis*” in Categorización 2019 de los mamíferos de Argentina según su riesgo de extinción. Lista Roja de los mamíferos de Argentina, eds. SAyDS–SAREM. http://cma.sarem.org.ar [Accessed February 15, 2021].

Vélez-Rubio, G.M., Estrades, A., Fallabrino, A., and Tomás, J. (2013). Marine turtle threats in Uruguayan waters: insights from 12 years of stranding data. *Mar. Biol.* 160, 1-15.

Vermeulen, E., Failla, M., Loizaga de Castro, R., Romero, M.A., Svendsen, G., Coscarella, M.A., Cáceres-Saez, I., Bastida, R., and Dassis, M. (2019). “*Tursiops truncatus*” in Categorización 2019 de los mamíferos de Argentina según su riesgo de extinción. Lista Roja de los mamíferos de Argentina, eds. SAyDS–SAREM. http://cma.sarem.org.ar [Accessed February 15, 2021].

**Supplementary Table 4**. List of references used to assess attributes of charismatic species in the Río de la Plata estuarine area**.**

BirdLife International. (2018). *Larus dominicanus*. *The IUCN Red List of Threatened Species* 2018: e.T22694329A132542863. <https://dx.doi.org/10.2305/IUCN.UK.2018-2.RLTS.T22694329A132542863.en> [Accessed June 20, 2021].

BirdLife International. (2020). *Spheniscus magellanicus*. *The IUCN Red List of Threatened Species* 2020: e.T22697822A157428850. <https://dx.doi.org/10.2305/IUCN.UK.2020-3.RLTS.T22697822A157428850.en> [Accessed February 20, 2021].

Bordino, P., Wells, R., and Stamper, M. (2008). Satellite tracking of Franciscana dolphins *Pontoporia blainvillei* in Argentina: preliminary information on ranging, diving and social patterns. IWC Scientific Committee Meeting, June, Santiago, Chile. SC60/SM14.

Broderick, A. and Patricio, A. (2019). *Chelonia mydas (South Atlantic subpopulation)*. *The IUCN Red List of Threatened Species* 2019: e.T142121866A142086337. <https://dx.doi.org/10.2305/IUCN.UK.2019-2.RLTS.T142121866A142086337.en> [Accessed February 20, 2021].

Burgues, M.F., Lenzi, J., Machín, E., Genta, L., and Teixeira De Mello, F. (2020). Temporal variation of Kelp Gull’s (*Larus dominicanus*) diet on a coastal island of the Rio de la Plata Estuary, Uruguay: Refuse as an alternative food source. *Waterbirds* 43, 65-74.

Cárdenas-Alayza, S., Oliveira, L., and Crespo, E. 2016a. *Arctocephalus australis*. *The IUCN Red List of Threatened Species* 2016: e.T2055A45223529. <https://dx.doi.org/10.2305/IUCN.UK.2016-1.RLTS.T2055A45223529.en> [Accessed June 20, 2021].

Cárdenas-Alayza, S., Crespo, E., and Oliveira, L. (2016b). *Otaria byronia*. *The IUCN Red List of Threatened Species* 2016: e.T41665A61948292. <https://dx.doi.org/10.2305/IUCN.UK.2016-1.RLTS.T41665A61948292.en> [Accessed June 20, 2021].

Casale, P. and Marcovaldi, M. (2015). *Caretta caretta (South West Atlantic subpopulation)*. *The IUCN Red List of Threatened Species* 2015: e.T84191235A84191397. <https://dx.doi.org/10.2305/IUCN.UK.2015-4.RLTS.T84191235A84191397.en> [Accessed February 20, 2021].

Crespo E.A., de Oliveira L.R., Sepúlveda M. (2021) South American Sea Lion (Otaria flavescens, Shaw 1800). In: Heckel G., Schramm Y. (eds) Ecology and Conservation of Pinnipeds in Latin America. Springer, Cham. https://doi.org/10.1007/978-3-030-63177-2_

del Bene, D., Little, V., Rossi, R and Le Bas, A. (2006). “Revisión preliminar de registros de varamientos de cetáceos en la costa uruguaya de 1934 a 2005”, in *Bases para la conservación y el manejo en la costa Uruguaya*, eds. R. Menafra, L. Rodríguez-Gallego, F. Scarabino and D. Conde. (Montevideo, UY: Vida Silvestre Uruguay), 297-303.

Denuncio, P., Bastida, R., Dassis, M., Giardino, G., Gerpe, M., and Rodríguez, D. (2011). Plastic ingestion in Franciscana dolphins, *Pontoporia blainvillei* (Gervais and d'Orbigny, 1844), from Argentina. *Mar. Pollut. Bull*. 62, 1836-1841.

Denuncio, P., Mandiola, M.A., Pérez Salles, S., Machado, R., Ott, P.H., Oliveira, L.R., and Rodriguez, D. (2017). Marine debris ingestion by the South American Fur Seal from the Southwest Atlantic Ocean. *Mar. Pollut. Bull.* 122, 420-425.

Franco‐Trecu, V., Drago, M., Baladán, C., García‐Olazábal, M. D., Crespo, E. A., Cardona, L., and Inchausti, P. (2015). Postharvesting population dynamics of the South American sea lion (*Otaria byronia*) in the southwestern Atlantic. *Mar. Mamm. Sci.* *31*(3), 963-978.

Franco-Trecu, V., Drago, M., Katz, H., Machín, E., and Marín, Y. (2017). With the noose around the neck: marine debris entangling otariid species. *Environ. Pollut.* 220, 985-989.

González Carman, V., Álvarez, K., Prosdocimi, L., Inchaurraga, M.C., Dellacasa, R.F., Faiella, A., Echenique, C., González, R., Andrejuk, J., Mianzan, H., Campagna, C., and Albareda, D.A. (2011). Argentinian coastal waters: A temperate habitat for three species of threatened sea turtles. *Mar. Biol. Res.* 7, 500-508.

González Carman, V., Falabella, V., Maxwell, S., Albareda, D., Campagna, C., and Mianzan, H. (2012). Revisiting the ontogenetic shift paradigm: The case of juvenile green turtles in the SW Atlantic. *J. Exp. Mar. Biol. Ecol.* 429, 64-72.

González Carman, V., Acha, E.M., Maxwell, S.M., Albareda, D., Campagna, C., and Mianzan, H. (2014). Young green turtles, *Chelonia mydas*, exposed to plastic in a frontal area of the SW Atlantic. *Mar. Pollut. Bull.* 78, 56-65.

González Carman, V., Bruno, I., Maxwell, S., Álvarez, K., Albareda, D., Acha, E.M., and Campagna, C. (2016a). Habitat use, site fidelity and conservation opportunities for juvenile loggerhead sea turtles in the Río de la Plata, Argentina. *Mar. Biol.* 163, 20.

González Carman, V., Mandiola, A., Alemany, D., Dassis, M., Seco Pon, J.P., Prosdocimi, L., Ponce De León, A., Mianzan, H., Acha, E.M., Rodríguez, D., Favero, M., and Copello, S. (2016b). Distribution of megafaunal species in the Southwestern Atlantic: key ecological areas and opportunities for marine conservation. *ICES J. Mar. Sci.* 73, 1579-1588.

Lenzi, J., Burgues, M.A., Carrizo, D., Machín, E., and Teixeira-de Mello, F. (2016). Plastic ingestion by a generalist seabird on the coast of Uruguay. *Mar. Pollut. Bull.* 107, 71-76.

López-Mendilaharsu, M., Rocha, C.F.D., Miller, P., Domingo, A., and Prosdocimi, L. (2009). Insights on leatherback turtle movements and high use areas in the Southwest Atlantic Ocean. *J. Exp. Mar. Biol. Ecol.* 378, 31-39.

Rodríguez, D.H., Dassis, M., Ponce De León, A., Barreiro, C., Farenga, M., Bastida, R.O., and Davis, R.W. (2013). Foraging strategies of Southern sea lion females in the La Plata River Estuary (Argentina-Uruguay). *Deep Sea Research Part II: Topical Studies in Oceanography* 88, 120-130.

Stokes, D.L., Boersma, P.D., De Casenave, J.L., and García-Borboroglu, P. (2014). Conservation of migratory Magellanic penguins requires marine zoning. *Biol. Conserv.* 170, 151-161.

Tiwari, M., Wallace, B.P. and Girondot, M. (2013). *Dermochelys coriacea (Southwest Atlantic Ocean subpopulation)*. *The IUCN Red List of Threatened Species* 2013: e.T46967838A46967842. <https://dx.doi.org/10.2305/IUCN.UK.2013-2.RLTS.T46967838A46967842.en> [Accessed February 20, 2021].

Vélez-Rubio, G.M., Estrades, A., Fallabrino, A., and Tomás, J. (2013). Marine turtle threats in Uruguayan waters: insights from 12 years of stranding data. *Mar. Biol.* 160, 1-15.

Vélez-Rubio, G., Teryda, N., Asaroff, P., Estrades, A., Rodriguez, D., and Tomás, J. (2018). Differential impact of marine debris ingestion during ontogenetic dietary shift of green turtles in Uruguayan waters. *Mar. Pollut. Bull.* 127, 603-611.

Zerbini, A.N., Secchi, E., Crespo, E., Danilewicz, D. and Reeves, R. (2017). *Pontoporia blainvillei* (errata version published in 2018). *The IUCN Red List of Threatened Species* 2017: e.T17978A123792204. <https://dx.doi.org/10.2305/IUCN.UK.2017-3.RLTS.T17978A50371075.en> [Accessed February 20, 2021].
